# Supplementary figures and images for: LncRNA TUG1 mitigates renal interstitial fibrosis through miR-542-3p / HIF-1α/VEGF axis
Source: Research Square preprint supplement (doi:10.21203/rs.3.rs-4022893/v1), 2024-03-15

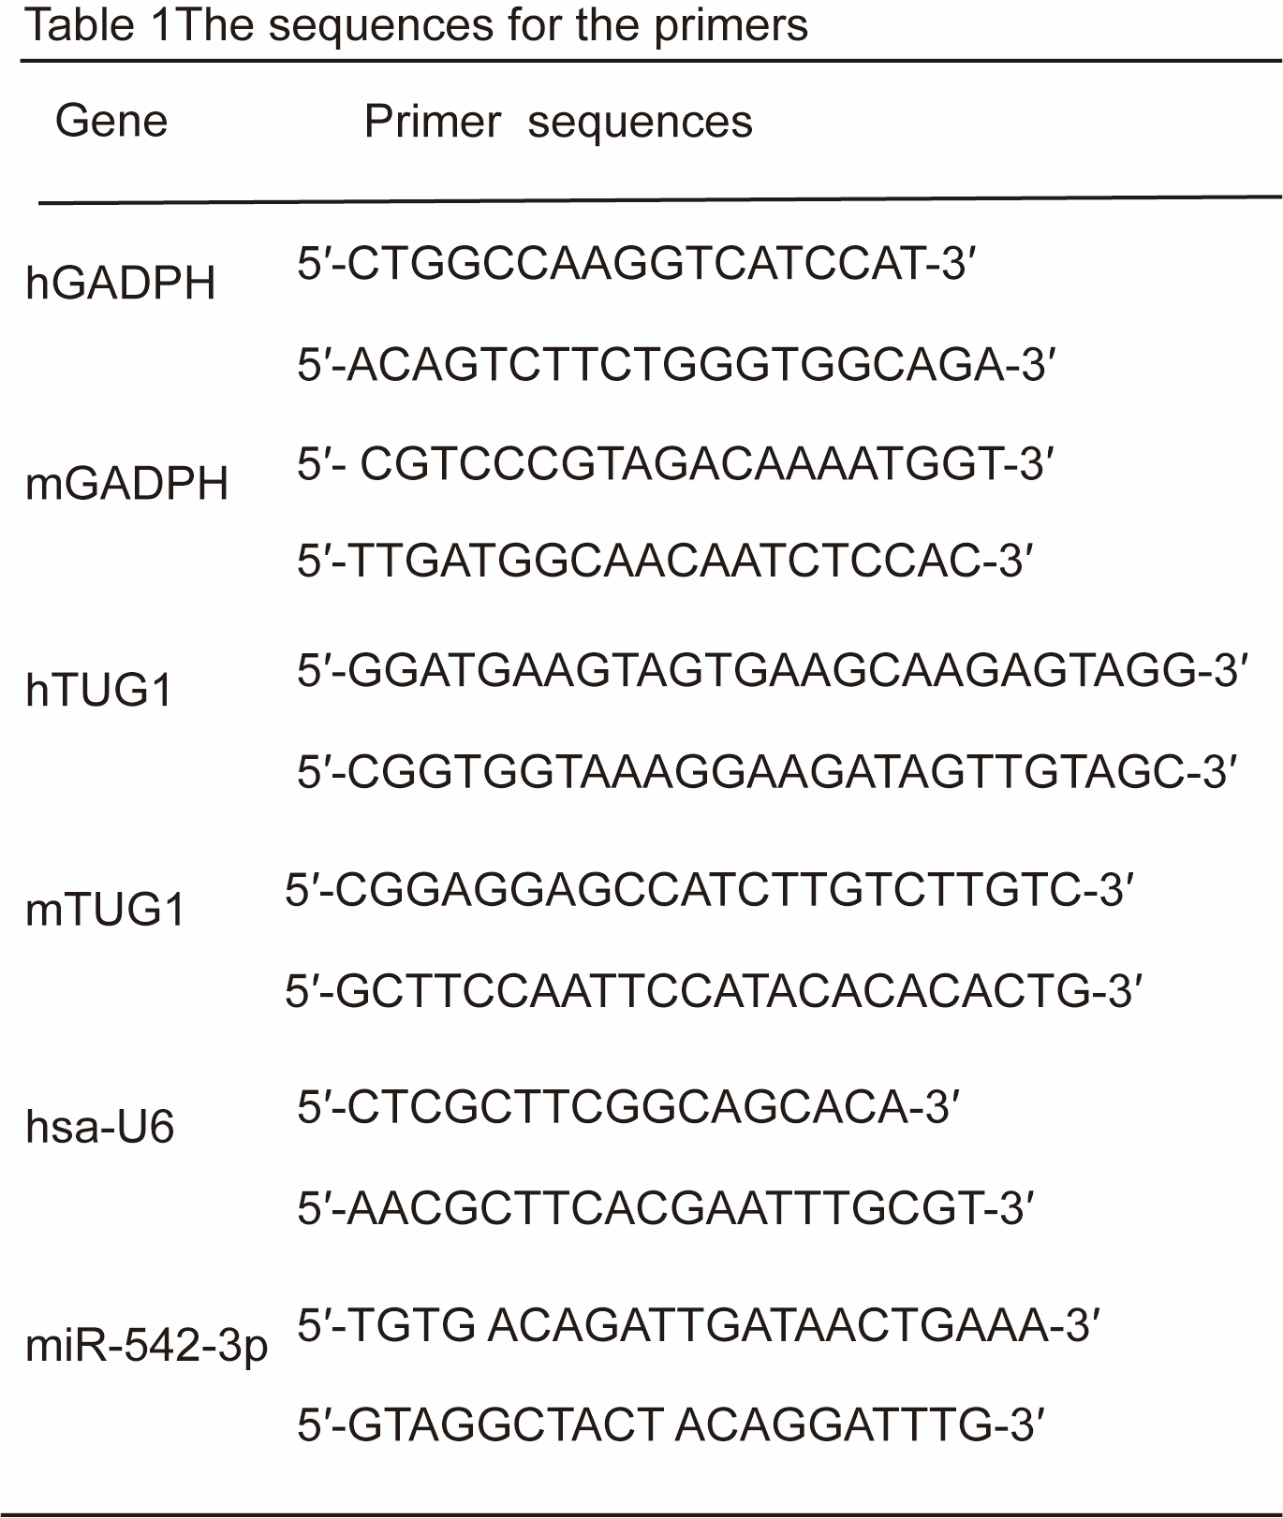

Supplement: Supplementary file 1 [file ed7798915412d20e8c90edcb.docx]
